# Supplementary material for: Dietary Cholesterol Intake and Sources among U.S Adults: Results from National Health and Nutrition Examination Surveys (NHANES), 2001–2014
Source: PubMed Central journal article supplement (PMC6024549; doi:10.3390/nu10060771), 2018-06-14
Supplement: nutrients-10-00771-s001.pdf [file nutrients-10-00771-s001.pdf]

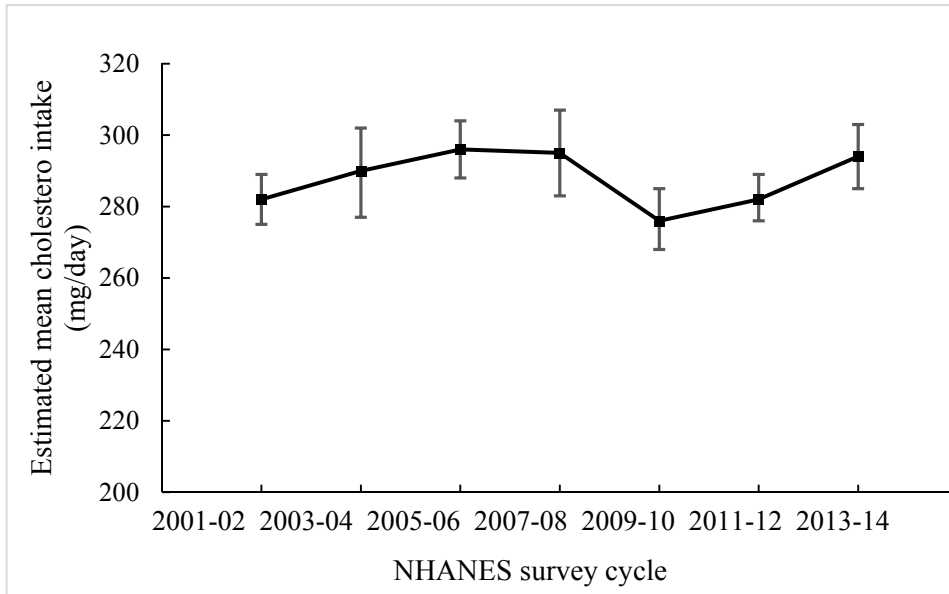

**Figure S1.** Estimated mean<sup>1</sup> (95% confidence intervals) of total dietary cholesterol intake for the U.S. adults 20 years of age or older, in NHANES survey cycles: 2001-2002 to 2013-2014

<sup>1</sup> Age and sex adjusted means of cholesterol intake by direct standardization to the 2000 US Census population

**Table S1.** Crude and adjusted\* mean dietary cholesterol intake and cholesterol density (proportion of cholesterol of total calories) for the U.S. adults 20 years of age or older, NHANES survey cycles: 2001-2002 to 2013-2014

| NHANES<br>survey cycle | Mean intake (mg/day) |                    | Density (mg/1000 kcal) |                    |
|------------------------|----------------------|--------------------|------------------------|--------------------|
|                        | Crude                | Adjusted           | Crude                  | Adjusted           |
| <b>Overall</b>         | 287 (284-291)        | 288 (285-292)      | 134 (133-136)          | 134 (133-136)      |
| <b>2001-2002</b>       | 283 (275-291)        | 282 (275-289)      | 130 (126-133)          | 130 (126-133)      |
| <b>2003-2004</b>       | 289 (276-302)        | 290 (277-302)      | 135 (130-139)          | 134 (129-139)      |
| <b>2005-2006</b>       | 295 (286-303)        | 296 (288-304)      | 136 (133-139)          | 136 (133-139)      |
| <b>2007-2008</b>       | 292 (280-304)        | 295 (283-307)      | 138 (134-142)          | 139 (135-142)      |
| <b>2009-2010</b>       | 276 (267-285)        | 276 (268-285)      | 130 (126-135)          | 130 (125-134)      |
| <b>2011-2012</b>       | 282 (275-289)        | 282 (276-289)      | 132 (128-136)          | 131 (127-136)      |
| <b>2013-2014</b>       | 293 (285-301)        | 294 (285-303)      | 139 (136-142)          | 139 (136-142)      |
| <b>P-trend</b>         | 0.895                | 0.977 <sup>+</sup> | 0.072                  | 0.340 <sup>+</sup> |

\* Adjusted mean intake was calculated by direct standardization to the 2000 US Census population, adjusted for age and sex.

<sup>+</sup> Adjusted *p*-trend values were calculated from a survey weighted linear regression modeling survey cycle as ordinal variable, adjusted for race, age, and sex.

**Table S2.** Estimated means<sup>1</sup> of total dietary cholesterol intake for the U.S. adults 20 years of age or older, NHANES survey cycles: 2001-2002 to 2013-2014

|                           | Overall | 2001-02 | 2003-04 | 2005-06 | 2007-08 | 2009-10 | 2011-12 | 2013-14 | p-trend* |
|---------------------------|---------|---------|---------|---------|---------|---------|---------|---------|----------|
| <b>N (unweighted)</b>     | 34,741  | 4,744   | 4,448   | 4,520   | 5,419   | 5,762   | 4,801   | 5,047   |          |
| <b>Overall</b>            | 288     | 282     | 290     | 296     | 295     | 276     | 282     | 294     | 0.98     |
| <b>Sex</b>                |         |         |         |         |         |         |         |         |          |
| <b>Male</b>               | 348     | 339     | 349     | 361     | 364     | 334     | 340     | 350     | 0.91     |
| <b>Female</b>             | 232     | 229     | 235     | 236     | 231     | 223     | 228     | 242     | 0.72     |
| <b>Age group</b>          |         |         |         |         |         |         |         |         |          |
| <b>20-29</b>              | 295     | 293     | 303     | 290     | 286     | 286     | 290     | 315     | 0.49     |
| <b>30-49</b>              | 306     | 306     | 305     | 322     | 322     | 287     | 296     | 304     | 0.052    |
| <b>50-69</b>              | 281     | 264     | 285     | 284     | 288     | 279     | 279     | 284     | 0.39     |
| <b>70+</b>                | 232     | 219     | 228     | 245     | 229     | 219     | 229     | 250     | 0.13     |
| <b>Race</b>               |         |         |         |         |         |         |         |         |          |
| <b>Non-Hispanic White</b> | 282     | 278     | 282     | 292     | 292     | 268     | 274     | 284     | 0.56     |
| <b>Non-Hispanic Black</b> | 310     | 304     | 307     | 304     | 311     | 316     | 306     | 323     | 0.13     |
| <b>Mexican American</b>   | 319     | 322     | 331     | 313     | 312     | 297     | 320     | 330     | 0.73     |
| <b>Other</b>              | 275     | 251     | 279     | 290     | 276     | 260     | 270     | 288     | 0.43     |

<sup>1</sup> Age and sex adjusted means of cholesterol intake by direct standardization to the 2000 US Census population

\* *p*-trend values were calculated from a survey weighted linear regression modeling survey cycle as ordinal variable, adjusted for race, age, and sex.

**Table S3.** Estimated total dietary cholesterol intake (mg/day) and percentage (%) by food groups with meat/grain products subgroups for US adults aged ≥20 years in NHANES, 2013–2014.

|                                  | Milk <sup>a</sup>      | Eggs                    | Meat                    |                       |                        |                       |                       |                       | Grain products         |                            |                       |                          | Other                  | All                   |                                   |
|----------------------------------|------------------------|-------------------------|-------------------------|-----------------------|------------------------|-----------------------|-----------------------|-----------------------|------------------------|----------------------------|-----------------------|--------------------------|------------------------|-----------------------|-----------------------------------|
|                                  |                        |                         | All meat                | Red meat              | Poultry                | Processed meat        | Seafood               | Mixed dishes          | All grain products     | Cooked grains <sup>b</sup> | Breads <sup>c</sup>   | RTE cereals <sup>d</sup> |                        |                       | Other grain products <sup>e</sup> |
| <b>Overall</b>                   | 33 (11.2)              | 74 (25.4)               | 123 (41.9)              | 24 (8.3)              | 34 (11.7)              | 15 (5.1)              | 15 (5.0)              | 36 (12.2)             | 51 (17.5)              | 1 (0.0)                    | 14 (4.8)              | 0 (0.0)                  | 36 (12.3)              | 12 (4.0)              | 293 (100)                         |
| <b>Sex</b>                       |                        |                         |                         |                       |                        |                       |                       |                       |                        |                            |                       |                          |                        |                       |                                   |
| <b>Male (ref.)</b>               | 38 (11.0)              | 89 (25.6)               | 151 (43.3)              | 32 (9.4)              | 42 (12.2)              | 19 (5.6)              | 17 (4.9)              | 40 (11.5)             | 58 (16.7)              | 1 (0.0)                    | 15 (4.3)              | 0 (0.0)                  | 43 (12.4)              | 12 (3.5)              | 348 (100)                         |
| <b>Female</b>                    | 28 (11.6) <sup>+</sup> | 61 (25.2)               | 97 (40.1) <sup>*</sup>  | 17 (6.9) <sup>+</sup> | 27 (11.0)              | 11 (4.6) <sup>+</sup> | 12 (5.1)              | 32 (13.2)             | 45 (18.5)              | 1 (0.0)                    | 14 (5.8) <sup>+</sup> | 0 (0.0)                  | 30 (12.4)              | 11 (4.7) <sup>+</sup> | 242 (100)                         |
| <b>Age group</b>                 |                        |                         |                         |                       |                        |                       |                       |                       |                        |                            |                       |                          |                        |                       |                                   |
| <b>20-29 (ref.)</b>              | 34 (10.7)              | 81 (25.6)               | 131 (41.5)              | 28 (8.8)              | 42 (13.2)              | 15 (4.6)              | 13 (4.3)              | 37 (11.8)             | 59 (18.9)              | 0 (0.0)                    | 12 (3.8)              | 0 (0.0)                  | 47 (14.9)              | 10 (3.3)              | 315 (100)                         |
| <b>30-49</b>                     | 33 (10.8)              | 71 (23.5)               | 132 (43.5) <sup>*</sup> | 28 (9.2)              | 37 (12.3)              | 15 (5.1)              | 16 (5.3)              | 35 (11.7)             | 56 (18.6) <sup>*</sup> | 1 (0.0)                    | 13 (4.3)              | 0 (0.0)                  | 43 (14.2)              | 11 (3.6)              | 303 (100)                         |
| <b>50-69</b>                     | 32 (11.2)              | 74 (26.3)               | 117 (41.3)              | 21 (7.3)              | 31 (11.0)              | 15 (5.4)              | 14 (5.1)              | 36 (12.7)             | 48 (17.0) <sup>+</sup> | 1 (0.0)                    | 16 (5.7) <sup>+</sup> | 0 (0.0)                  | 31 (11.0)              | 12 (4.2)              | 283 (100)                         |
| <b>70+</b>                       | 35 (13.5)              | 74 (28.9)               | 100 (39.2)              | 19 (7.3)              | 22 (8.7)               | 14 (5.7)              | 13 (4.9)              | 34 (13.2)             | 32 (12.5) <sup>+</sup> | 1 (0.0) <sup>*</sup>       | 16 (6.3) <sup>+</sup> | 0 (0.0)                  | 15 (5.9) <sup>+</sup>  | 15 (5.8) <sup>+</sup> | 255 (100)                         |
| <b>Race</b>                      |                        |                         |                         |                       |                        |                       |                       |                       |                        |                            |                       |                          |                        |                       |                                   |
| <b>Non-Hispanic White (ref.)</b> | 37 (13.2)              | 69 (24.4)               | 115 (40.8)              | 23 (8.2)              | 29 (10.2)              | 17 (5.9)              | 13 (4.5)              | 35 (12.4)             | 48 (17.1)              | 1 (0.0)                    | 15 (5.3)              | 0 (0.0)                  | 33 (11.7)              | 13 (4.5)              | 282 (100)                         |
| <b>Non-Hispanic Black</b>        | 22 (6.7) <sup>+</sup>  | 78 (24.4)               | 166 (51.8) <sup>+</sup> | 28 (8.7)              | 57 (17.8) <sup>+</sup> | 16 (5.1)              | 27 (8.3) <sup>+</sup> | 45 (14.1)             | 44 (13.8)              | 1 (0.0)                    | 15 (4.7)              | 0 (0.0)                  | 28 (8.8)               | 11 (3.3) <sup>+</sup> | 320 (100)                         |
| <b>Mexican American</b>          | 24 (7.2) <sup>+</sup>  | 102 (30.1) <sup>+</sup> | 111 (32.8) <sup>*</sup> | 25 (7.5)              | 33 (9.9)               | 9 (2.7) <sup>+</sup>  | 9 (2.6)               | 31 (9.2) <sup>+</sup> | 91 (27) <sup>+</sup>   | 0 (0.0)                    | 14 (4.1)              | 0 (0.0)                  | 77 (22.8) <sup>+</sup> | 10 (2.9)              | 338 (100)                         |
| <b>Other</b>                     | 27 (9.4) <sup>+</sup>  | 79 (27.2)               | 132 (45.3) <sup>*</sup> | 26 (8.9)              | 41 (14.2) <sup>+</sup> | 10 (3.4) <sup>+</sup> | 18 (6.1) <sup>+</sup> | 35 (12.0)             | 44 (15.1)              | 1 (0.0)                    | 12 (4.1)              | 0 (0.0)                  | 31 (10.6)              | 9 (3.1)               | 292 (100)                         |

<sup>a</sup> Milk refers to milk and milk products

<sup>b</sup> Cooked grains refer to cooked grains and cereals

<sup>c</sup> Breads refer to breads and breads products

<sup>d</sup> RTE cereals refer to ready-to-eat cereals

<sup>e</sup> Other grain products refer to not cooked cereals, grain mixtures, and meat substitutes

\*  $p < 0.05$ , <sup>+</sup>  $p < 0.01$  for percentage of dietary cholesterol intake comparison

**Table S4.** Food and nutrients intake of one-day dietary measures by dietary cholesterol intake quartiles for U.S. **men** aged  $\geq 20$  years in NHANES, 2013–2014.

|                                                             | <b>Overall</b> | <b>Q1</b>   | <b>Q2</b>   | <b>Q3</b>   | <b>Q4</b>    | <b>P-trend*</b> |
|-------------------------------------------------------------|----------------|-------------|-------------|-------------|--------------|-----------------|
| <b>N (unweighted)</b>                                       | 2414           | 612         | 596         | 603         | 603          |                 |
| <b>Cholesterol intake, mean(SE), mg/day</b>                 | 348 (7.7)      | 101 (2.1)   | 216 (1.4)   | 368 (3.2)   | 731 (18.1)   |                 |
| <b>Cholesterol intake, range, mg/day</b>                    | (0, 2584)      | (0, 160)    | (161, 277)  | (278, 476)  | (477, 2584)  |                 |
| <b>Food intake, mean (SE), mg/day</b>                       |                |             |             |             |              |                 |
| <b>Milk and milk products</b>                               | 226 (10.8)     | 175 (12.5)  | 223 (16.4)  | 251 (20.7)  | 253 (19.9)   | <0.001          |
| <b>Meat, Poultry, Fish &amp; Mixtures</b>                   | 248 (7.6)      | 113 (6.2)   | 226 (8.8)   | 293 (13.0)  | 365 (18.7)   | <0.001          |
| <b>Eggs</b>                                                 | 31 (1.4)       | 2 (0.9)     | 7 (2.1)     | 20 (1.9)    | 103 (5.0)    | <0.001          |
| <b>Legumes, Nuts and Seeds</b>                              | 36 (2.1)       | 45 (5.0)    | 29 (3.9)    | 32 (3.8)    | 39 (4.1)     | 0.53            |
| <b>Grain products</b>                                       | 373 (7.4)      | 307 (10.9)  | 363 (18.3)  | 396 (9.8)   | 426 (14.7)   | <0.001          |
| <b>Fruits</b>                                               | 147 (6.6)      | 160 (14.8)  | 128 (10.9)  | 139 (11.1)  | 165 (9.5)    | 0.63            |
| <b>Vegetables</b>                                           | 180 (9.2)      | 137 (6.4)   | 174 (11.6)  | 179 (16.0)  | 231 (18.9)   | <0.001          |
| <b>Fats, Oils &amp; Salad Dressings</b>                     | 13 (0.9)       | 8 (1.0)     | 14 (1.9)    | 14 (1.6)    | 15 (1.7)     | 0.003           |
| <b>Nutrients intake, mean (SE)</b>                          |                |             |             |             |              |                 |
| <b>Protein, mean (SE), gm/day</b>                           | 98 (1.25)      | 58 (1.9)    | 87 (1.3)    | 108 (2.1)   | 141 (3.3)    | <0.001          |
| <b>Carbohydrate, mean (SE), gm/day</b>                      | 287 (3.2)      | 240 (5.1)   | 280 (7.0)   | 302 (7.9)   | 327 (8.8)    | <0.001          |
| <b>Dietary fiber, mean (SE), gm/day</b>                     | 19 (0.4)       | 17 (0.6)    | 19 (0.5)    | 19 (0.7)    | 21 (0.9)     | 0.004           |
| <b>Total fat, mean (SE), gm/day</b>                         | 95 (1.3)       | 59 (1.3)    | 86 (2.1)    | 103 (2.1)   | 134 (3.1)    | <0.001          |
| <b>Total saturated fatty acids, mean (SE), gm/day</b>       | 31 (0.5)       | 18 (0.4)    | 28 (0.8)    | 35 (0.9)    | 44 (1.0)     | <0.001          |
| <b>Total monounsaturated fatty acids, mean (SE), gm/day</b> | 33 (0.4)       | 21 (0.5)    | 30 (0.7)    | 35 (0.7)    | 48 (1.1)     | <0.001          |
| <b>Total polyunsaturated fatty acids, mean (SE), gm/day</b> | 22 (0.5)       | 15 (0.5)    | 20 (0.7)    | 23 (0.7)    | 30 (1.2)     | <0.001          |
| <b>Vitamin C, mean (SE), mg/day</b>                         | 83 (2.4)       | 71 (5.1)    | 79 (4.1)    | 80 (5.6)    | 105 (6.9)    | 0.008           |
| <b>Vitamin D, mean (SE), mcg/day</b>                        | 6 (0.3)        | 3 (0.3)     | 5 (0.2)     | 6 (0.3)     | 8 (1.0)      | <0.001          |
| <b>Calcium, mean (SE), mg/day</b>                           | 1086 (18.3)    | 759 (22.9)  | 1058 (28.3) | 1169 (35.9) | 1363 (33.8)  | <0.001          |
| <b>Phosphorus, mean (SE), mg/day</b>                        | 1625 (17.9)    | 1096 (33.7) | 1502 (28.4) | 1753 (33.8) | 2171 (48.4)  | <0.001          |
| <b>Sodium, mean (SE), mg/day</b>                            | 4094 (53.3)    | 2694 (48.1) | 3767 (76.0) | 4496 (95.6) | 5470 (123.8) | <0.001          |
| <b>Potassium, mean (SE), mg/day</b>                         | 3016 (36.0)    | 2317 (59.7) | 2875 (64.4) | 3126 (71.4) | 3782 (64.1)  | <0.001          |

\* *p*-trend values were calculated from a survey weighted linear regression modeling cholesterol intake quartiles as ordinal variable

**Table S5.** Food and nutrients intake of one-day dietary measures by dietary cholesterol intake quartiles for U.S. **women** aged  $\geq 20$  years in NHANES, 2013–2014.

|                                                             | <b>Overall</b> | <b>Q1</b>   | <b>Q2</b>   | <b>Q3</b>   | <b>Q4</b>   | <b>P-trend*</b> |
|-------------------------------------------------------------|----------------|-------------|-------------|-------------|-------------|-----------------|
| <b>N (unweighted)</b>                                       | 2633           | 660         | 659         | 656         | 658         |                 |
| <b>Cholesterol intake, mean(SE), mg/day</b>                 | 242 (3.10)     | 69 (1.3)    | 149 (1.2)   | 255 (1.7)   | 519 (5.7)   |                 |
| <b>Cholesterol intake, range, mg/day</b>                    | (0, 1944)      | (0, 111)    | (112, 191)  | (192, 333)  | (334, 1944) |                 |
| <b>Food intake, mean (SE), mg/day</b>                       |                |             |             |             |             |                 |
| <b>Milk and milk products</b>                               | 172 (6.1)      | 139 (9.0)   | 171 (5.9)   | 197 (12.2)  | 184 (10.8)  | 0.002           |
| <b>Meat, Poultry, Fish &amp; Mixtures</b>                   | 173 (5.3)      | 86 (6.0)    | 152 (8.6)   | 212 (10.2)  | 251 (15.1)  | <0.001          |
| <b>Eggs</b>                                                 | 24 (1.5)       | 2 (0.7)     | 3 (0.7)     | 15 (1.6)    | 79 (4.9)    | <0.001          |
| <b>Legumes, Nuts and Seeds</b>                              | 26 (1.2)       | 29 (2.5)    | 21 (3.1)    | 27 (2.8)    | 28 (3.0)    | 0.80            |
| <b>Grain products</b>                                       | 284 (5.3)      | 222 (8.5)   | 300 (9.6)   | 315 (7.7)   | 302 (12.9)  | <0.001          |
| <b>Fruits</b>                                               | 141 (6.0)      | 136 (9.9)   | 143 (11.0)  | 139 (9.9)   | 147 (15.4)  | 0.65            |
| <b>Vegetables</b>                                           | 167 (4.4)      | 141 (6.8)   | 165 (10.4)  | 165 (9.2)   | 200 (10.3)  | 0.001           |
| <b>Fats, Oils &amp; Salad Dressings</b>                     | 11 (0.7)       | 9 (1.0)     | 10 (0.9)    | 14 (1.4)    | 13 (1.4)    | 0.002           |
| <b>Nutrients intake, mean (SE)</b>                          |                |             |             |             |             |                 |
| <b>Protein, mean (SE), gm/day</b>                           | 70 (0.8)       | 43 (1.1)    | 62 (1.1)    | 80 (0.8)    | 97 (2.6)    | <0.001          |
| <b>Carbohydrate, mean (SE), gm/day</b>                      | 220 (3.0)      | 184 (5.1)   | 217 (4.4)   | 239 (3.8)   | 244 (9.3)   | <0.001          |
| <b>Dietary fiber, mean (SE), gm/day</b>                     | 99 (1.7)       | 83 (2.8)    | 96 (2.5)    | 107 (2.3)   | 110 (5.4)   | <0.001          |
| <b>Total fat, mean (SE), gm/day</b>                         | 15 (0.3)       | 14 (0.5)    | 15 (0.5)    | 16 (0.4)    | 16 (0.5)    | <0.001          |
| <b>Total saturated fatty acids, mean (SE), gm/day</b>       | 71 (0.7)       | 45 (1.6)    | 64 (1.8)    | 83 (2.1)    | 96 (2.9)    | <0.001          |
| <b>Total monounsaturated fatty acids, mean (SE), gm/day</b> | 23 (0.2)       | 13 (0.4)    | 21 (0.5)    | 28 (0.8)    | 31 (1.0)    | <0.001          |
| <b>Total polyunsaturated fatty acids, mean (SE), gm/day</b> | 25 (0.3)       | 16 (0.7)    | 21 (0.7)    | 28 (0.7)    | 34 (1.1)    | 0.007           |
| <b>Vitamin C, mean (SE), mg/day</b>                         | 17 (0.2)       | 12 (0.6)    | 15 (0.6)    | 19 (0.5)    | 22 (0.8)    | <0.001          |
| <b>Vitamin D, mean (SE), mcg/day</b>                        | 75 (2.2)       | 66 (3.6)    | 78 (4.3)    | 70 (3.8)    | 86 (3.9)    | <0.001          |
| <b>Calcium, mean (SE), mg/day</b>                           | 4 (0.1)        | 3 (0.2)     | 3 (0.2)     | 5 (0.3)     | 6 (0.3)     | 0.004           |
| <b>Phosphorus, mean (SE), mg/day</b>                        | 852 (10.9)     | 642 (22.7)  | 840 (20.1)  | 971 (22.9)  | 971 (34.1)  | <0.001          |
| <b>Sodium, mean (SE), mg/day</b>                            | 1187 (12.2)    | 820 (21.7)  | 1101 (21.8) | 1339 (12.9) | 1526 (37.7) | <0.001          |
| <b>Potassium, mean (SE), mg/day</b>                         | 2997 (22.1)    | 2003 (43.7) | 2818 (59.3) | 3393 (52.0) | 3869 (95.9) | <0.001          |

\* *p*-trend values were calculated from a survey weighted linear regression modeling cholesterol intake quartiles as ordinal variable
